# Supplementary figures and images for: Predictive Assessment of the Consistency of Pituitary Adenomas Using Signal Intensity In Magnetic Resonance Imaging and Fractal Dimension of Histopathological Features
Source: Research Square preprint supplement (doi:10.21203/rs.3.rs-2184377/v1), 2022-10-24

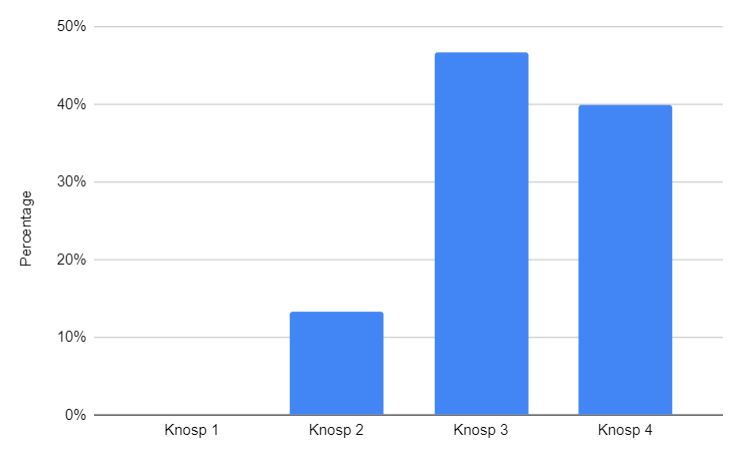


**Chart 1:** Knosp Graduation

Supplement: Supplementary file 1 [file 23a4abe1b16241c6ce5c74ac.docx]
